# Supplementary material for: Current Views and Perspectives on E-Mental Health: An Exploratory Survey Study for Understanding Public Attitudes Toward Internet-Based Psychotherapy in Germany
Source: PubMed Central journal article supplement (PMC5378055; doi:10.2196/mental.6375), 2017-02-23
Supplement: mental_v4i1e8_app2.pdf [file mental_v4i1e8_app2.pdf]

## Multimedia Appendix 2

**Table A2. Structure matrix. factor loadings of the exploratory factor analysis (EFA) with promax for the e-therapy attitude measure (N = 1558).**

| Items of the E-therapy attitudes measure                                                                                                                                   | Factors                     |                      |                              |
|----------------------------------------------------------------------------------------------------------------------------------------------------------------------------|-----------------------------|----------------------|------------------------------|
|                                                                                                                                                                            | 1.Usefulness or Helpfulness | 2.Relative Advantage | 3.E-Accessibility Healthcare |
| 7. Health insurance companies should cover the costs for Internet-based therapies.                                                                                         | <b>.820</b>                 | .432                 | .234                         |
| 9. Trust in a therapist can be just as easily built on the Internet as in conventional face-to-face psychotherapy                                                          | <b>.733</b>                 | .659                 | .102                         |
| 12. In case of mental health problems, I would attend an Internet-based therapy.                                                                                           | <b>.721</b>                 | .580                 | +++                          |
| 1. Internet-based therapies are modern and in line with our modern times.                                                                                                  | <b>.715</b>                 | .303                 | .102                         |
| 8. Internet-based therapy programs are as effective as conventional face-to-face psychotherapy.                                                                            | <b>.714</b>                 | .643                 | .150                         |
| 3. Internet-based therapy is better compatible with work and private life than conventional face-to-face therapy.                                                          | <b>.701</b>                 | .305                 | +++                          |
| 13. I would prefer an Internet-based therapy to a conventional psychotherapy.                                                                                              | .414                        | <b>.820</b>          | .393                         |
| 11. Internet-based therapies are an appropriate alternative to conventional face-to-face psychotherapy.                                                                    | .642                        | <b>.746</b>          | .309                         |
| 10. Regarding therapeutic success, it makes no difference whether contacts with a therapist are provided via the Internet or face-to-face in a psychotherapeutic practice. | .686                        | <b>.716</b>          | .235                         |
| 4. It makes no difference to me whether psychotherapy is conducted through the Internet or in a practice in a clinic.                                                      | .228                        | <b>.716</b>          | .382                         |
| 2. Internet-based therapies will replace conventional face-to-face psychotherapy in the future.                                                                            | .324                        | <b>.614</b>          | .390                         |
| 5. Internet-based therapies will reach more people with mental health problems.                                                                                            | .312                        | .540                 | <b>.667</b>                  |
| 6. Internet-based therapies can help bridging waiting time for conventional psychotherapy.                                                                                 | .480                        | .471                 | <b>.569</b>                  |
| 14. Internet-based therapies will reach more patients and help them.                                                                                                       | +++                         | +++                  | <b>-.110</b>                 |

Extraction method: principal axis factor analysis; rotation method: promax with Kaiser normalization.

<sup>a</sup> Factor loadings smaller than .1 were suppressed (+++).

<sup>b</sup> Item rotation converged in 6 iterations.

<sup>c</sup> Mapping of items to factor: bold values indicate that the highest factor loading on a factor.
