# Supplementary material for: Current Views and Perspectives on E-Mental Health: An Exploratory Survey Study for Understanding Public Attitudes Toward Internet-Based Psychotherapy in Germany
Source: PubMed Central journal article supplement (PMC5378055; doi:10.2196/mental.6375), 2017-02-23
Supplement: mental_v4i1e8_app3.pdf [file mental_v4i1e8_app3.pdf]

## Multimedia Appendix 3

**Table A3. Mapping of items of the e-therapy attitudes measure to constructs in technology acceptance model (TAM) framework.**

| Items of the e-attitudes measure                                                                                                                                           | EFA-factor <sup>a</sup>               | Related UTAUT constructs <sup>b,c</sup>                                                                                   |
|----------------------------------------------------------------------------------------------------------------------------------------------------------------------------|---------------------------------------|---------------------------------------------------------------------------------------------------------------------------|
| 1. Internet-based therapies are modern and in line with our modern times.                                                                                                  | <b>1 usefulness or helpfulness</b>    | <b>Performance expectancy</b><br>Perceived usefulness<br><b>Social influence</b><br>Subjective norm                       |
| 2. Internet-based therapies will replace conventional face-to-face psychotherapy in the future.                                                                            | <b>2 advantage or comparability</b>   | <b>Performance expectancy</b><br>Relative advantage<br><b>Social influence</b><br>Subjective norm                         |
| 3. Internet-based therapy is better compatible with work and private life than conventional face-to-face therapy.                                                          | <b>1 usefulness or helpfulness</b>    | <b>Performance expectancy</b><br>Perceived usefulness<br><b>Effort expectancy</b>                                         |
| 4. It makes no difference to me whether psychotherapy is conducted through the Internet or in a practice in a clinic.                                                      | <b>2 advantage or comparability</b>   | <b>Performance expectancy</b><br>Relative advantage<br>Outcome expectancy                                                 |
| 5. Internet-based therapies will reach more people with mental health problems.                                                                                            | <b>3 e-accessibility (healthcare)</b> | <b>Performance expectancy</b><br>Perceived usefulness<br>Relative advantage<br><b>Social influence</b><br>Subjective norm |
| 6. Internet-based therapies can help bridging waiting time for conventional psychotherapy.                                                                                 | <b>3 e-accessibility (healthcare)</b> | <b>Performance expectancy</b><br>Perceived usefulness<br>Relative advantage<br><b>Social influence</b><br>Subjective norm |
| 7. Health insurance companies should cover the costs for Internet-based therapies.                                                                                         | <b>1 usefulness or helpfulness</b>    | <b>Performance expectancy</b><br>Perceived usefulness<br><b>Social influence</b><br>Subjective norm                       |
| 8. Internet-based therapy programs are as effective as conventional face-to-face psychotherapy.                                                                            | <b>1 usefulness or helpfulness</b>    | <b>Performance expectancy</b><br>Perceived usefulness<br>Outcome expectancy<br>Relative advantage                         |
| 9. Trust in a therapist can be just as easily built on the Internet as in conventional face-to-face psychotherapy                                                          | <b>1 usefulness or helpfulness</b>    | <b>Performance expectancy</b><br>Perceived usefulness<br><b>Facilitating factors</b><br>Human support                     |
| 10. Regarding therapeutic success, it makes no difference whether contacts with a therapist are provided via the Internet or face-to-face in a psychotherapeutic practice. | <b>1 usefulness or helpfulness</b>    | <b>Performance expectancy</b><br>Perceived usefulness<br><b>Facilitating factors</b><br>Human support                     |
| 11. Internet-based therapies are an appropriate alternative to conventional face-to-face psychotherapy.                                                                    | <b>2 advantage or comparability</b>   | <b>Performance expectancy</b><br>Relative advantage<br>Outcome expectancy                                                 |
| 12. In case of mental health problems, I would attend an Internet-based therapy.                                                                                           | <b>1 usefulness or helpfulness</b>    | <b>Performance expectancy</b><br>Perceived usefulness<br><b>Behavioral intention to use</b>                               |
| 13. I would prefer an Internet-based therapy to a conventional psychotherapy.                                                                                              | <b>2 advantage or comparability</b>   | <b>Performance expectancy</b><br>Relative advantage<br>Outcome expectancy                                                 |
| 14. Internet-based therapies will reach more patients and help them.                                                                                                       | <b>3 e-accessibility (healthcare)</b> | <b>Performance expectancy</b><br>Perceived usefulness<br>Relative advantage<br><b>Social influence</b><br>Subjective norm |

<sup>a</sup>EFA = exploratory factor analysis.

<sup>b</sup>: UTAUT = unified theory of acceptance and use of technology (Venkatesh et al., 2003).

<sup>c</sup>: Bold terms indicate the dimensions of the UTAUT that were mapped to the content of the factors identified through the exploratory factor analysis for the e-therapy attitudes measure. The mapping was conducted qualitatively (face validity).
