# Supplementary material for: Current Views and Perspectives on E-Mental Health: An Exploratory Survey Study for Understanding Public Attitudes Toward Internet-Based Psychotherapy in Germany
Source: PubMed Central journal article supplement (PMC5378055; doi:10.2196/mental.6375), 2017-02-23
Supplement: mental_v4i1e8_app4.pdf [file mental_v4i1e8_app4.pdf]

## Multimedia Appendix 4

**Table A4. Pattern Matrix: factor loadings of the exploratory factor analysis (EFA) with promax for the e-therapy attitude measure (N = 1558).**

| Items of the e-therapy attitudes measure                                                                                                                                   | Factors <sup>a-d</sup>       |                                        |
|----------------------------------------------------------------------------------------------------------------------------------------------------------------------------|------------------------------|----------------------------------------|
|                                                                                                                                                                            | 1. Usefulness or Helpfulness | 2. Relative advantage or Comparability |
| 7. Health insurance companies should cover the costs for Internet-based therapies.                                                                                         | <b>.880</b>                  | -.128                                  |
| 1. Internet-based therapies are modern and in line with our modern times.                                                                                                  | <b>.850</b>                  | -.256                                  |
| 3. Internet-based therapy is better compatible with work and private life than conventional face-to-face therapy.                                                          | <b>.828</b>                  | -.242                                  |
| 12. In case of mental health problems, I would attend an Internet-based therapy.                                                                                           | <b>.669</b>                  | .109                                   |
| 9. Trust in a therapist can be just as easily built on the Internet as in conventional face-to-face psychotherapy                                                          | <b>.629</b>                  | .205                                   |
| 8. Internet-based therapy programs are as effective as conventional face-to-face psychotherapy.                                                                            | <b>.607</b>                  | .216                                   |
| 10. Regarding therapeutic success, it makes no difference whether contacts with a therapist are provided via the Internet or face-to-face in a psychotherapeutic practice. | <b>.497</b>                  | .374                                   |
| 4. It makes no difference to me whether psychotherapy is conducted through the Internet or in a practice in a clinic.                                                      | -.221                        | <b>.872</b>                            |
| 13. I would prefer an Internet-based therapy to a conventional psychotherapy.                                                                                              | +++                          | <b>.833</b>                            |
| 2. Internet-based therapies will replace conventional face-to-face psychotherapy in the future.                                                                            | +++                          | <b>.645</b>                            |
| 5. Internet-based therapies will reach more people with mental health problems.                                                                                            | +++                          | <b>.604</b>                            |
| 11. Internet-based therapies are an appropriate alternative to conventional face-to-face psychotherapy.                                                                    | .401                         | <b>.480</b>                            |
| 6. Internet-based therapies can help bridging waiting time for conventional psychotherapy.                                                                                 | .284                         | <b>.348</b>                            |
| 14. Internet-based therapies will reach more patients and help them.                                                                                                       | +++                          | <b>-.106</b>                           |

Extraction method: principal axis factor analysis; rotation method: promax with Kaiser normalization.

<sup>a</sup> Factor loadings smaller than .1 were suppressed (+++).

<sup>b</sup> Item rotation converged in 3 iterations.

<sup>c</sup> Mapping of items to factor: bold values indicate that the highest factor loading on a factor.

<sup>d</sup> The internal consistency for "relative advantage" was  $\alpha = .78$  and for the subscale "usefulness or helpfulness"  $\alpha = .89$  (for the whole 14-item measure:  $\alpha = .89$ ). The cumulative explained variance amounted to 56.35 percent for the initial eigenvalue (factor 1: 43.3 %, factor 2: 13.01 %) and 49.9 % for the extracted sums of squared loadings (factor 1: 40.17 %, factor 2: 9.71 %).
